# Supplementary material for: Classifying and predicting the electron affinity of diamond nanoparticles using machine learning
Source: Royal Society of Chemistry journal article supplement (doi:10.1039/c9nh00060g), 2019-01-01
Supplement: c9nh00060g2.csv [file c9nh00060g2.csv]

Nanoparticle	NC	NH	NH/NC	D_nm	Shape	Ani	E	EA	dCC	dCCe	dCH	dCHe	tCCC	tCCCe	tCCH	tCCHe
1	5989	904	0.1509	4.2218	Cuboctahedron	1.105	-292645.3876	-3.391	1.543	0.015	1.116	0.003	109.22	3.04	111.6	1.94
2	5975	976	0.1633	4.2187	Truncated octahedron	1.099	-292862.4965	-1.3483	1.541	0.009	1.118	0.002	109.42	1.77	109.79	1.64
3	4608	780	0.1693	3.8853	Cuboctahedron	1.105	-225941.0094	-3.4553	1.543	0.017	1.116	0.005	109.17	3.31	111.83	2.53
4	4886	844	0.1727	3.958	Truncated octahedron	1.099	-239917.4882	-1.3515	1.542	0.009	1.118	0.003	109.4	1.96	109.92	1.73
5	3944	688	0.1744	3.6991	Cuboctahedron	1.105	-193633.9686	-3.4713	1.542	0.015	1.117	0.003	109.24	2.96	111.15	2
6	5149	904	0.1756	4.0243	Modified rhombic dodecahedron	1.0313	-252852.1695	-0.8459	1.543	0.019	1.114	0.003	109.4	2.62	110.2	2.11
7	5418	960	0.1772	4.0897	Small rhombicuboctahedron	1.0481	-266223.5802	-0.9329	1.543	0.015	1.115	0.003	109.45	2.06	109.69	1.87
8	5387	976	0.1812	4.0823	Modified truncated octahedron	1.0501	-264965.7078	-1.0071	1.542	0.011	1.116	0.003	109.48	1.56	109.36	1.52
9	5456	1024	0.1877	4.0988	Octahedron	1.1826	-268800.1768	-3.4328	1.54	0.003	1.119	0.002	109.52	0.3	108.96	0.13
10	4337	820	0.1891	3.8116	Small rhombicuboctahedron	1.0481	-213585.0078	-0.932	1.543	0.016	1.115	0.003	109.43	2.3	109.83	1.94
11	2983	564	0.1891	3.388	Cuboctahedron	1.105	-146835.4341	-3.5202	1.543	0.018	1.116	0.003	109.15	3.43	111.64	1.9
12	4363	828	0.1898	3.8188	Truncated octahedron	1.099	-215004.8056	-3.4598	1.541	0.007	1.119	0.002	109.47	1.34	109.37	1.21
13	4370	844	0.1931	3.8208	Modified truncated octahedron	1.0501	-215439.3658	-1.0125	1.542	0.012	1.116	0.003	109.47	1.73	109.43	1.59
14	5975	1156	0.1935	4.2187	Truncated octahedron	1.099	-294631.1055	-3.6448	1.543	0.009	1.11	0.015	109.51	0.69	109.26	0.76
15	5939	1152	0.194	4.2106	Rhombi-truncated cube	1.0346	-292830.0378	-1.0761	1.543	0.011	1.112	0.004	109.49	1.51	109.31	1.81
16	5838	1152	0.1973	4.1877	Rhombi-truncated octahedron	1.0833	-288116.6132	-3.5067	1.542	0.007	1.114	0.005	109.53	0.42	108.94	1.2
17	4495	900	0.2002	3.855	Octahedron	1.1826	-222005.0021	-3.4747	1.54	0.003	1.119	0.002	109.53	0.31	108.96	0.13
18	5387	1084	0.2012	4.0823	Modified truncated octahedron	1.0501	-266047.5124	-3.6029	1.542	0.009	1.112	0.01	109.52	0.58	109.07	1.05
19	3522	712	0.2022	3.5695	Truncated octahedron	1.099	-173979.8577	-3.4999	1.541	0.007	1.119	0.002	109.46	1.49	109.41	1.29
20	3392	688	0.2028	3.5275	Rhombi-truncated cube	1.0346	-167475.5486	-0.9288	1.543	0.018	1.114	0.003	109.4	2.6	110.02	2.01
21	4715	964	0.2045	3.9136	Modified rhombic dodecahedron	1.0313	-232992.8226	-3.5259	1.542	0.009	1.114	0.004	109.51	1.16	109.14	1.47
22	4363	900	0.2063	3.8188	Truncated octahedron	1.099	-215723.38	-3.5895	1.541	0.006	1.116	0.009	109.52	0.54	109.03	0.39
23	6107	1260	0.2063	4.2481	Rhombic dodecahedron	1.1053	-301907.5381	-3.5485	1.542	0.007	1.112	0.004	109.54	0.44	108.94	1.44
24	3481	720	0.2068	3.5564	Small rhombicuboctahedron	1.0481	-172062.7265	-1.0168	1.542	0.013	1.115	0.003	109.46	1.94	109.53	1.67
25	4886	1024	0.2096	3.958	Truncated octahedron	1.099	-241685.6458	-2.3774	1.543	0.01	1.109	0.016	109.51	0.75	109.31	0.81
26	4762	1006	0.2113	3.9259	Rhombi-truncated cube	1.0346	-235589.3781	-1.0994	1.543	0.012	1.111	0.005	109.49	1.56	109.35	1.8
27	5939	1260	0.2122	4.2106	Rhombi-truncated cube	1.0346	-293909.2772	-3.6567	1.543	0.009	1.109	0.009	109.53	0.596	109.07	1.5
28	5418	1152	0.2126	4.0897	Small rhombicuboctahedron	1.0481	-268128.4964	-3.6931	1.544	0.011	1.106	0.015	109.52	0.7	109.3	1.34
29	4757	1012	0.2127	3.9246	Rhombi-truncated octahedron	1.0833	-235478.1912	-3.5468	1.542	0.007	1.114	0.005	109.54	0.43	108.95	1.23
30	3654	784	0.2146	3.6111	Octahedron	1.1826	-180980.0673	-3.5158	1.54	0.003	1.119	0.002	109.53	0.32	108.97	0.14
31	3318	712	0.2146	3.5032	Modified truncated octahedron	1.0501	-164297.3608	-3.5414	1.541	0.01	1.117	0.003	109.5	1.35	109.23	1.2
32	3725	808	0.2169	3.6331	Modified rhombic dodecahedron	1.0313	-184477.4938	-1.0681	1.543	0.013	1.113	0.004	109.47	1.89	109.48	1.84
33	4370	952	0.2178	3.8208	Modified truncated octahedron	1.0501	-216520.9941	-3.6537	1.543	0.009	1.111	0.011	109.53	0.63	109.1	1.08
34	3741	824	0.2203	3.638	Modified rhombic dodecahedron	1.0313	-185389.4546	-1.0764	1.543	0.013	1.112	0.004	109.47	1.89	109.49	1.88
35	4921	1084	0.2203	3.9669	Rhombic dodecahedron	1.1053	-243944.4526	-3.5807	1.542	0.007	1.112	0.004	109.54	0.45	108.96	1.42
36	2793	616	0.2206	3.3189	Truncated octahedron	1.099	-138465.4778	-3.5742	1.541	0.008	1.118	0.005	109.46	1.55	109.45	1.28
37	3522	784	0.2226	3.5695	Truncated octahedron	1.099	-174698.4159	-3.6452	1.541	0.007	1.116	0.009	109.53	0.59	109.04	0.42
38	2712	604	0.2227	3.2884	Small rhombicuboctahedron	1.0481	-134456.295	-1.0189	1.542	0.015	1.115	0.003	109.55	2.2	109.66	1.76
39	1730	396	0.2289	2.8586	Cuboctahedron	1.105	-85837.9279	-3.6533	1.542	0.017	1.117	0.003	109.18	3.32	111.06	1.96
40	2096	480	0.229	3.0342	Truncated octahedron	1.099	-104061.9114	-3.609	1.541	0.011	1.118	0.002	109.38	2.21	109.92	1.68
41	3318	760	0.2291	3.5032	Modified truncated octahedron	1.0501	-164783.4198	-3.6352	1.541	0.007	1.115	0.007	109.54	0.54	108.98	0.73
42	4762	1096	0.2302	3.9259	Rhombi-truncated cube	1.0346	-236488.3721	-3.7115	1.543	0.01	1.108	0.009	109.54	0.64	109.11	1.52
43	2925	675	0.2308	3.3672	Octahedron	1.1826	-145333.7867	-3.553	1.54	0.004	1.119	0.002	109.53	0.34	108.98	0.18
44	3812	880	0.2308	3.6596	Rhombi-truncated octahedron	1.0833	-189368.9782	-3.5942	1.542	0.007	1.113	0.005	109.54	0.45	108.96	1.25
45	2613	604	0.2312	3.2504	Modified truncated octahedron	1.0501	-129803.1702	-3.5909	1.541	0.01	1.117	0.003	109.49	1.51	109.28	1.27
46	1755	406	0.2313	2.8714	Cuboctahedron	1.105	-87125.7069	-3.6587	1.542	0.016	1.116	0.004	109.2	3.21	110.94	1.96
47	2168	504	0.2325	3.0663	Truncated octahedron	1.099	-107722.7462	-3.6043	1.541	0.009	1.119	0.002	109.42	1.9	109.65	1.48
48	4337	1012	0.2333	3.8116	Small rhombicuboctahedron	1.0481	-215489.0736	-3.7567	1.544	0.012	1.105	0.015	109.52	0.77	109.37	1.39
49	2876	676	0.235	3.3495	Rhombi-truncated cube	1.0346	-142923.8154	-1.0724	1.543	0.015	1.113	0.004	109.46	2.15	109.61	1.92
50	3481	828	0.2379	3.5564	Small rhombicuboctahedron	1.0481	-173144.107	-3.7132	1.543	0.01	1.11	0.011	109.53	0.68	109.14	1.11
51	3912	936	0.2393	3.6896	Rhombic dodecahedron	1.1053	-194647.0013	-3.6326	1.542	0.007	1.112	0.005	109.55	0.47	108.98	1.43
52	2000	480	0.24	2.9903	Truncated octahedron	1.099	-99500.7961	-3.6499	1.542	0.011	1.116	0.007	109.37	2.29	110.05	1.75
53	5989	1444	0.2411	4.2218	Cuboctahedron	1.105	-297838.7832	-3.9086	1.548	0.014	1.088	0.023	109.5	1.04	110.42	1.49
54	2055	496	0.2414	3.0156	Small rhombicuboctahedron	1.0481	-102240.5603	-1.0172	1.543	0.017	1.115	0.003	109.2	2.53	109.83	1.85
55	2793	676	0.242	3.3189	Truncated octahedron	1.099	-139064.1968	-3.7106	1.541	0.007	1.115	0.1	109.53	0.65	109.06	0.45
56	1880	456	0.2426	2.9333	Truncated octahedron	1.099	-93561.0152	-3.6708	1.542	0.013	1.114	0.008	109.31	2.62	110.4	1.89
57	2627	640	0.2436	3.2558	Rhombi-truncated cube	1.0346	-130745.262	-1.0687	1.543	0.015	1.114	0.008	109.34	2.55	110.18	3.41
58	2258	552	0.2445	3.1054	Modified truncated octahedron	1.0501	-112482.9933	-3.6169	1.54	0.006	1.119	0.004	109.5	1.14	109.2	0.93
59	2119	528	0.2492	3.0446	Rhombi-truncated cube	1.0346	-105581.9141	-1.0412	1.543	0.017	1.113	0.004	109.42	2.5	109.8	1.94
60	2613	652	0.2495	3.2504	Modified truncated octahedron	1.0501	-130289.2061	-3.6973	1.541	0.008	1.115	0.007	109.54	0.58	108.99	0.75
61	2300	576	0.2504	3.1234	Octahedron	1.1826	-114723.0323	-3.6197	1.5	0.004	1.119	0.002	109.54	0.34	108.98	0.16
62	2012	504	0.2505	2.9959	Modified truncated octahedron	1.0501	-100320.2655	-3.6503	1.541	0.012	1.117	0.003	109.48	1.72	109.36	1.35
63	1639	412	0.2514	2.8111	Truncated octahedron	1.099	-81731.5882	-3.6748	1.541	0.011	1.118	0.002	109.39	2.19	109.81	1.59
64	2995	756	0.2524	3.3923	Rhombi-truncated octahedron	1.0833	-149409.5018	-3.6516	1.542	0.008	1.113	0.005	109.55	0.47	108.97	1.28
65	1201	304	0.2531	2.5541	Cuboctahedron	1.105	-59843.5382	-3.7272	1.542	0.022	1.116	0.002	109.02	4.02	111.71	1.84
66	2258	576	0.2551	3.1054	Modified truncated octahedron	1.0501	-112723.7411	-3.6966	1.541	0.005	1.118	0.006	109.54	0.53	108.99	0.26
67	2155	552	0.2561	3.0606	Rhombi-truncated cube	1.0346	-107519.7651	-1.0714	1.543	0.017	1.112	0.004	109.43	2.49	109.79	1.99
68	3044	784	0.2576	3.4096	Rhombic dodecahedron	1.1053	-152001.6005	-3.6713	1.542	0.008	1.112	0.005	109.55	0.48	108.97	1.37
69	3392	880	0.2594	3.5275	Rhombi-truncated cube	1.0346	-169378.5735	-3.8316	1.545	0.013	1.103	0.016	109.53	0.85	109.46	1.45
70	3944	1024	0.2596	3.6991	Cuboctahedron	1.105	-196890.909	-3.9353	1.547	0.014	1.095	0.021	109.51	1.08	109.98	1.31
71	1276	334	0.2618	2.6021	Cuboctahedron	1.105	-63708.2856	-3.7474	1.543	0.018	1.114	0.006	109.13	3.56	111.21	1.95
72	2256	592	0.2624	3.1046	Small rhombicuboctahedron	1.0481	-112734.9795	-1.1644	1.542	0.012	1.113	0.004	109.5	1.65	109.32	1.65
73	2712	712	0.2625	3.2884	Small rhombicuboctahedron	1.0481	-135537.3324	-3.7843	1.543	0.011	1.109	0.012	109.53	0.75	109.19	1.16
74	1502	396	0.2636	2.7363	Modified rhombic dodecahedron	1.0313	-75035.9791	-1.0103	1.543	0.021	1.115	0.003	109.37	2.97	110.07	1.94
75	2168	576	0.2657	3.0663	Truncated octahedron	1.099	-108441.2246	-3.8543	1.542	0.008	1.114	0.01	109.53	0.73	109.09	0.49
76	2271	610	0.2686	3.111	Modified rhombic dodecahedron	1.0313	-113618.3246	-3.7211	1.542	0.012	1.112	0.005	109.5	1.66	109.33	1.72
77	2876	784	0.2726	3.3495	Rhombi-truncated cube	1.0346	-144002.6715	-3.8257	1.544	0.011	1.107	0.011	109.54	0.76	109.19	1.47
78	2052	560	0.2729	3.0143	Rhombi-truncated octahedron	1.0833	-102787.7633	-3.6911	1.541	0.007	1.115	0.008	109.56	0.56	108.91	0.96
79	1771	484	0.2733	2.8794	Octahedron	1.1826	-88731.9805	-3.6872	1.54	0.004	1.119	0.002	109.55	0.36	108.99	0.17
80	1507	412	0.2734	2.7391	Modified truncated octahedron	1.0501	-75469.1587	-3.7216	1.542	0.014	1.112	0.003	109.46	1.97	109.52	1.43
81	1198	328	0.2738	2.5521	Truncated octahedron	1.099	-59992.6489	-3.7638	1.541	0.013	1.118	0.003	109.33	2.57	110.03	1.71
82	2012	552	0.2744	2.9959	Modified truncated octahedron	1.0501	-100806.2676	-3.7701	1.541	0.009	1.114	0.008	109.55	0.63	109.01	0.78
83	2096	576	0.2748	3.0342	Truncated octahedron	1.099	-105019.5323	-3.9086	1.542	0.01	1.112	0.011	109.53	0.82	109.13	0.54
84	4608	1272	0.276	3.8853	Cuboctahedron	1.105	-230667.6783	-1.5107	1.55	0.016	1.085	0.021	109.5	1.14	110.62	1.46
85	2298	640	0.2785	3.1225	Rhombic dodecahedron	1.1053	-115220.291	-3.7226	1.542	0.008	1.112	0.005	109.56	0.5	109	1.31
86	2256	640	0.2837	3.1046	Small rhombicuboctahedron	1.0481	-113219.9495	-3.7964	1.542	0.01	1.111	0.007	109.55	0.65	109.02	1.31
87	2000	576	0.288	2.9903	Truncated octahedron	1.099	-100448.1261	-3.9092	1.542	0.011	1.116	0.007	109.37	2.29	110.05	1.75
88	1580	456	0.2886	2.7794	Small rhombicuboctahedron	1.0481	-79350.4985	-3.7722	1.542	0.013	1.113	0.006	109.47	1.99	109.51	1.71
89	1671	484	0.2896	2.828	Small rhombicuboctahedron	1.0481	-83936.5539	-3.7764	1.543	0.013	1.109	0.004	109.48	1.9	109.47	1.68
90	2827	828	0.2929	3.3315	Great rhombicuboctahedron	1.0603	-142033.8838	-3.9578	1.547	0.015	1.095	0.019	109.52	1.11	109.89	1.44
91	2575	756	0.2936	3.2355	Great rhombicuboctahedron	1.0603	-129417.5194	-3.9214	1.546	0.014	1.1	0.016	109.53	0.96	109.58	1.52
92	2055	604	0.2939	3.0156	Small rhombicuboctahedron	1.0481	-103321.1379	-3.8713	1.544	0.012	1.107	0.013	109.54	0.84	109.25	1.21
93	1628	480	0.2948	2.8053	Modified truncated octahedron	1.0501	-81876.8363	-3.7815	1.542	0.01	1.113	0.005	109.51	1.4	109.26	1.48
94	1639	484	0.2953	2.8111	Truncated octahedron	1.099	-82449.9824	-3.9462	1.542	0.009	1.113	0.011	109.54	0.83	109.12	0.54
95	2119	636	0.3001	3.0446	Rhombi-truncated cube	1.0346	-106662.7903	-3.9587	1.544	0.013	1.106	0.012	109.54	0.084	109.26	1.37
96	1330	400	0.3008	2.6355	Octahedron	1.1826	-66993.2713	-3.7695	1.54	0.004	1.119	0.003	109.55	0.38	109	0.18
97	1090	328	0.3009	2.4792	Modified truncated octahedron	1.0501	-54870.3443	-1.13	1.542	0.016	1.116	0.003	109.44	2.35	109.61	1.56
98	837	252	0.3011	2.2871	Truncated octahedron	1.099	-42126.283	-3.8755	1.541	0.016	1.117	0.003	109.24	3.09	110.36	1.82
99	2983	900	0.3017	3.388	Cuboctahedron	1.105	-150092.043	-3.998	1.549	0.016	1.091	0.021	109.51	1.22	110.22	1.37
100	1664	504	0.3029	2.8244	Rhombi-truncated octahedron	1.0833	-83829.4387	-3.8012	1.542	0.008	1.109	0.004	109.56	0.51	109.02	1.08
101	2627	796	0.303	3.2558	Rhombi-truncated cube	1.0346	-132265.4438	-3.9768	1.546	0.013	1.099	0.015	109.53	0.97	109.59	1.68
102	660	200	0.303	2.1282	Cuboctahedron	1.105	-33195.3066	-1.1837	1.544	0.026	1.116	0.002	108.88	4.48	111.84	1.77
103	1507	460	0.3052	2.7391	Modified truncated octahedron	1.0501	-75955.1134	-3.9211	1.542	0.01	1.114	0.008	109.55	0.7	109.04	0.82
104	2155	660	0.3063	3.0606	Rhombi-truncated cube	1.0346	-108598.3582	-3.9252	1.544	0.012	1.105	0.011	109.55	0.085	109.26	1.51
105	1880	576	0.3064	2.9333	Truncated octahedron	1.099	-94744.468	-3.9827	1.544	0.013	1.106	0.016	109.53	1.08	109.41	0.86
106	1680	520	0.3095	2.8327	Rhombi-truncated cube	1.0346	-84725.8097	-3.8396	1.542	0.01	1.111	0.005	109.52	1.39	109.29	1.68
107	1628	504	0.3096	2.8053	Modified truncated octahedron	1.0501	-82115.228	-3.8529	1.543	0.01	1.107	0.007	109.55	0.6	109.12	1.14
108	1713	532	0.3106	2.8499	Rhombi-truncated octahedron	1.0833	-86421.8781	-3.8127	1.542	0.008	1.108	0.004	109.56	0.48	109.07	1.27
109	1700	528	0.3106	2.8431	Rhombi-truncated octahedron	1.0833	-85766.3239	-3.9013	1.542	0.009	1.112	0.005	109.57	0.57	108.99	1.3
110	1061	332	0.3129	2.4588	Modified rhombic dodecahedron	1.0313	-53497.6807	-1.4061	1.544	0.023	1.112	0.005	109.33	3.39	110.27	2.04
111	1045	328	0.3139	2.4474	Modified rhombic dodecahedron	1.0313	-52715.3492	-1.1364	1.543	0.017	1.112	0.006	109.29	3.06	110.28	2.06
112	1722	544	0.3159	2.8545	Rhombic dodecahedron	1.1053	-86964.2207	-3.8353	1.542	0.009	1.111	0.005	109.57	0.53	109.03	1.39
113	1671	532	0.3184	2.828	Small rhombicuboctahedron	1.0481	-84421.4519	-3.9704	1.543	0.01	1.11	0.007	109.56	0.72	109.06	1.34
114	1580	504	0.319	2.7794	Small rhombicuboctahedron	1.0481	-79830.3008	-3.9031	1.543	0.012	1.109	0.01	109.55	0.81	109.16	1.17
115	1190	384	0.3227	2.5469	Small rhombicuboctahedron	1.0481	-60149.3904	-1.1931	1.543	0.015	1.112	0.004	109.46	2.28	109.58	1.81
116	705	228	0.3234	2.1711	Small rhombicuboctahedron	1.0481	-35622.5446	-1.0485	1.543	0.022	1.115	0.003	109.25	3.49	110.39	1.9
117	1680	544	0.3238	2.8327	Rhombi-truncated cube	1.0346	-84963.9805	-3.9114	1.543	0.01	1.109	0.0074	109.56	0.66	109.12	1.46
118	1195	388	0.3247	2.5501	Small rhombicuboctahedron	1.0481	-60443.4822	-3.8717	1.542	0.011	1.113	0.005	109.5	1.61	109.31	1.54
119	1120	364	0.325	2.4999	Modified truncated octahedron	1.0501	-56663.4271	-3.8574	1.541	0.01	1.115	0.005	109.53	1.25	109.18	1.16
120	1691	552	0.3264	2.8385	Great rhombicuboctahedron	1.0603	-85534.4844	-3.9945	1.546	0.015	1.103	0.016	109.53	1.14	109.54	1.11
121	1755	576	0.3282	2.8714	Cuboctahedron	1.105	-88794.5241	-4.0341	1.546	0.014	1.101	0.018	109.52	1.23	109.65	1.08
122	3495	1148	0.3285	3.5609	Great rhombicuboctahedron	1.0603	-176679.0391	-3.9748	1.552	0.019	1.083	0.017	109.5	1.3	110.82	1.37
123	1670	552	0.3305	2.8275	Great rhombicuboctahedron	1.0603	-84533.1073	-4.0184	1.546	0.015	1.101	0.017	109.53	1.16	109.58	1.15
124	1171	388	0.3313	2.5343	Modified truncated octahedron	1.0501	-59304.4458	-3.8932	1.542	0.011	1.112	0.006	109.51	1.64	109.35	1.57
125	1132	376	0.3322	2.5081	Rhombi-truncated octahedron	1.0833	-57356.4189	-3.8679	1.541	0.008	1.115	0.006	109.57	0.52	109.03	0.9
126	1730	576	0.3329	2.8586	Cuboctahedron	1.105	-87602.319	-4.059	1.547	0.014	1.1	0.018	109.53	1.26	109.7	1.13
127	1198	400	0.3339	2.5521	Truncated octahedron	1.099	-60710.9207	-3.9997	1.542	0.011	1.112	0.012	109.55	0.96	109.16	0.6
128	969	324	0.3344	2.3915	Octahedron	1.1826	-49127.4288	-3.8718	1.539	0.004	1.119	0.003	109.56	0.39	109.2	0.19
129	753	252	0.3347	2.2148	Modified truncated octahedron	1.0501	-38144.2837	-1.1307	1.542	0.019	1.116	0.003	109.39	2.84	109.82	1.69
130	1120	376	0.3357	2.4999	Modified truncated octahedron	1.0501	-56785.0123	-3.9094	1.541	0.009	1.115	0.006	109.57	0.65	109.01	0.81
131	548	184	0.3358	2.0123	Truncated octahedron	1.099	-27752.6476	-1.492	1.542	0.021	1.117	0.003	109.08	3.84	110.89	1.88
132	3583	1204	0.336	3.5889	Truncated cube	1.1772	-181357.3292	-3.8865	1.553	0.019	1.08	0.017	109.5	1.27	111.07	1.47
133	423	144	0.3404	1.6625	Truncated octahedron	1.099	-21370.1174	-3.4293	1.546	0.031	1.112	0.003	107.75	8.28	115.98	2.85
134	1878	640	0.3408	2.9324	Great rhombicuboctahedron	1.0603	-95226.5506	-4.0293	1.548	0.015	1.097	0.017	109.53	1.12	109.74	1.59
135	1207	412	0.3413	2.558	Rhombi-truncated octahedron	1.0833	-61257.0117	-3.9785	1.541	0.009	1.113	0.005	109.58	0.6	108.99	1.18
136	1195	412	0.3448	2.5501	Small rhombicuboctahedron	1.0481	-60685.669	-4.0051	1.542	0.01	1.112	0.006	109.57	0.62	109.05	1.24
137	1090	376	0.345	2.4792	Modified truncated octahedron	1.0501	-55356.2409	-4.0309	1.542	0.011	1.112	0.009	109.56	0.79	109.07	0.86
138	3647	1260	0.3455	3.6089	Cube	1.2407	-184917.5427	-1.5079	1.554	0.02	1.079	0.016	109.5	1.24	111.16	1.5
139	1894	656	0.3464	2.9401	Great rhombicuboctahedron	1.0603	-96138.8251	-4.0455	1.548	0.015	1.097	0.016	109.53	1.12	109.76	1.65
140	950	330	0.3474	2.1771	Decahedron	4.041	-48262.781	-4.0599	1.541	0.008	1.114	0.011	109.56	0.91	109.08	0.73
141	1223	428	0.35	2.5684	Rhombi-truncated octahedron	1.0833	-62168.9999	-4.0069	1.542	0.009	1.12	0.005	109.58	0.61	109.02	1.32
142	1232	432	0.3506	2.5742	Rhombic dodecahedron	1.1053	-62634.7981	-3.9272	1.542	0.009	1.111	0.005	109.58	0.56	109.07	1.37
143	1171	412	0.3518	2.5343	Modified truncated octahedron	1.0501	-59542.6432	-3.9718	1.543	0.011	1.11	0.008	109.57	0.72	109.14	1.27
144	925	330	0.3568	2.1578	Decahedron	3.5691	-47082.4985	-4.0684	1.541	0.009	1.115	0.005	109.57	0.89	108.93	0.48
145	980	350	0.3571	2.1998	Decahedron	4.4503	-49869.5482	-4.1492	1.543	0.007	1.11	0.019	109.56	0.84	109.27	1.16
146	2186	784	0.3586	3.0742	Truncated cube	1.1772	-111170.6993	-4.1185	1.551	0.016	1.089	0.018	109.52	1.27	110.25	1.77
147	674	244	0.362	2.1417	Modified truncated octahedron	1.0501	-34346.1745	-3.9848	1.539	0.009	1.119	0.002	109.5	1.51	109.29	0.92
148	805	292	0.3627	2.2602	Rhombi-truncated cube	1.0346	-40993.7558	-1.1664	1.543	0.018	1.112	0.005	109.41	2.78	109.82	1.96
149	1190	432	0.363	2.5469	Small rhombicuboctahedron	1.0481	-60634.2526	-4.0937	1.543	0.011	1.109	0.007	109.57	0.81	109.11	1.37
150	825	300	0.3636	2.0771	Decahedron	2.8978	-42039.6658	-4.1389	1.542	0.009	1.112	0.011	109.57	1.03	109.08	0.8
151	1123	412	0.3669	2.502	Great rhombicuboctahedron	1.0603	-57257.3373	-4.029	1.544	0.013	1.108	0.011	109.56	0.94	109.24	1.22
152	945	350	0.3704	2.1733	Decahedron	3.8845	-48217.1643	-3.9874	1.541	0.01	1.112	0.008	109.58	1.22	109.19	1.3
153	1228	460	0.3746	2.5716	Great rhombicuboctahedron	1.0603	-62683.0365	-4.0843	1.547	0.016	1.102	0.015	109.53	1.3	109.59	1.12
154	680	256	0.3765	2.1475	Octahedron	1.1826	-34754.9772	-4.0023	1.539	0.004	1.119	0.003	109.57	0.42	109.03	0.21
155	488	184	0.377	1.9436	Small rhombicuboctahedron	1.0481	-24911.3413	-1.1128	1.543	0.025	1.115	0.003	109.29	3.55	110.61	1.81
156	875	330	0.3771	2.1182	Decahedron	3.2388	-44683.0283	-4.2444	1.545	0.009	1.104	0.02	109.55	0.99	109.43	1.45
157	795	300	0.3774	2.2516	Rhombi-truncated octahedron	1.0833	-40630.5697	-3.9967	1.541	0.009	1.114	0.006	109.58	0.55	109.06	0.95
158	2330	880	0.3777	3.136	Truncated cube	1.1772	-118875.3049	-3.9478	1.554	0.02	1.083	0.018	109.58	1.39	110.84	1.43
159	624	236	0.3782	2.0925	Small rhombicuboctahedron	1.0481	-31859.4694	-1.0041	1.542	0.025	1.121	0.01	109.18	3.22	110.48	4.95
160	1276	484	0.3793	2.6021	Cuboctahedron	1.105	-65183.776	-1.761	1.548	0.016	1.1	0.017	109.52	1.41	109.73	1.1
161	674	256	0.3798	2.1417	Modified truncated octahedron	1.0501	-34469.0281	-4.042	1.539	0.005	1.118	0.004	109.57	0.55	109	0.19
162	785	300	0.3822	2.043	Decahedron	2.4916	-40142.4468	-4.147	1.543	0.013	1.112	0.008	109.57	1.14	109.02	0.61
163	323	124	0.3839	1.5195	Cuboctahedron	1.105	-16488.3767	1.0347	1.545	0.032	1.116	0.01	108.73	5.07	111.77	1.82
164	837	324	0.3871	2.2871	Truncated octahedron	1.099	-42844.4456	-4.1481	1.543	0.012	1.109	0.013	109.55	1.14	109.23	0.7
165	844	328	0.3886	2.2929	Rhombic dodecahedron	1.1053	-43222.893	-4.0242	1.541	0.01	1.112	0.006	109.59	0.57	109.05	1.21
166	2394	936	0.391	3.1626	Cube	1.2407	-122435.4877	-1.5528	1.555	0.022	1.081	0.016	109.5	1.35	110.96	1.48
167	437	172	0.3936	1.8806	Modified truncated octahedron	1.0501	-22395.5117	-4.1501	1.54	0.013	1.118	0.002	109.36	2.55	109.76	1.44
168	635	250	0.3937	1.9035	Decahedron	3.3733	-32546.3108	-4.1748	1.541	0.008	1.114	0.009	109.58	0.97	109.06	0.68
169	1165	460	0.3948	2.5303	Great rhombicuboctahedron	1.0603	-59679.7478	-4.1477	1.549	0.016	1.098	0.017	109.53	1.4	109.78	1.27
170	504	200	0.3968	1.9624	Modified rhombic dodecahedron	1.0313	-25823.4062	-1.1357	1.544	0.024	1.112	0.005	109.31	3.52	110.17	1.91
171	655	260	0.3969	1.9233	Decahedron	1.936	-33589.5069	-4.2308	1.542	0.01	1.112	0.008	109.57	1.08	109.02	0.81
172	753	300	0.3984	2.2148	Modified truncated octahedron	1.0501	-38630.1287	-4.174	1.542	0.012	1.111	0.009	109.57	0.92	109.12	0.91
173	1201	484	0.403	2.5541	Cuboctahedron	1.105	-61607.8981	-4.1688	1.55	0.017	1.095	0.018	109.52	1.47	109.99	1.26
174	665	270	0.406	1.9331	Decahedron	3.8008	-34153.951	-4.2743	1.543	0.007	1.11	0.018	109.57	0.92	109.28	1.19
175	615	250	0.4065	1.8833	Decahedron	2.8518	-31600.4464	-4.201	1.541	0.01	1.115	0.005	109.58	0.96	109.95	0.52
176	1855	756	0.4075	2.9212	Truncated cube	1.1772	-95179.4816	-3.9941	1.555	0.021	1.085	0.016	109.5	1.47	110.7	1.37
177	1274	520	0.4082	2.6008	Truncated cube	1.1772	-65408.664	-1.81	1.551	0.018	1.093	0.017	109.53	1.45	110.06	1.46
178	725	300	0.4138	1.9895	Decahedron	2.3486	-37272.8652	-4.3441	1.547	0.011	1.101	0.019	109.54	1.14	109.52	1.63
179	525	220	0.419	1.7866	Decahedron	2.2583	-27036.782	-4.28	1.542	0.009	1.113	0.008	109.58	1.06	109.02	0.74
180	1728	726	0.4201	2.8576	Cube	1.2407	-88705.2265	2.1357	1.555	0.03	1.096	0.041	109.54	1.8	110.22	2.23
181	805	340	0.4224	2.2602	Rhombi-truncated cube	1.0346	-41478.8617	-4.2029	1.544	0.013	1.107	0.008	109.58	0.094	109.19	1.39
182	705	300	0.4255	2.1711	Small rhombicuboctahedron	1.0481	-36347.8552	-4.204	1.544	0.015	1.108	0.011	109.56	1.14	109.23	0.93
183	610	260	0.4262	1.8782	Decahedron	1.6465	-31445.9429	-4.2152	1.545	0.016	1.108	0.012	109.57	1.37	109.2	0.82
184	455	196	0.4308	1.9034	Octahedron	1.1826	-23496.4405	-4.1737	1.538	0.005	1.118	0.003	109.59	0.44	109.06	0.24
185	575	250	0.4348	1.8416	Decahedron	2.6471	-29682.907	-4.3926	1.546	0.009	1.104	0.019	109.56	1.11	109.41	1.49
186	530	232	0.4377	1.9922	Rhombi-truncated octahedron	1.0833	-27398.1215	-4.1726	1.54	0.01	1.113	0.006	109.6	0.59	109.12	1.01
187	495	220	0.4444	1.7519	Decahedron	1.9312	-25610.8928	-4.2997	1.543	0.014	1.112	0.008	109.58	1.25	109.05	0.68
188	537	240	0.4469	2.0001	Cuboctahedron	1.105	-27760.6911	-1.5826	1.548	0.023	1.103	0.011	109.13	3.84	110.93	2.04
189	268	120	0.4478	1.4279	Truncated octahedron	1.099	-13870.9947	-1.4449	1.54	0.018	1.117	0.002	109.22	3.28	110.1	1.61
190	437	196	0.4485	1.8806	Modified truncated octahedron	1.0501	-22640.409	-4.2759	1.539	0.007	1.116	0.005	109.59	0.75	109	0.27
191	1465	660	0.4505	2.7153	Truncated cube	1.1772	-75768.1415	-1.5582	1.556	0.023	1.084	0.015	109.51	1.47	110.74	1.45
192	546	248	0.4542	2.0101	Rhombic dodecahedron	1.1053	-28310.1992	-4.2241	1.541	0.01	1.111	0.006	109.61	0.62	109.17	1.26
193	460	210	0.4565	1.7096	Decahedron	1.1654	-23858.182	-4.3306	1.542	0.01	1.113	0.005	109.59	1.03	108.97	0.85
194	549	252	0.459	2.0134	Rhombi-truncated octahedron	1.0833	-28489.7855	-4.2637	1.542	0.011	1.111	0.006	109.61	0.73	109.08	1.26
195	548	256	0.4672	2.0123	Truncated octahedron	1.099	-28470.8827	-4.3908	1.545	0.014	1.106	0.014	109.56	1.45	109.34	0.85
196	425	200	0.4706	1.6651	Decahedron	3.1577	-22093.0024	-4.4359	1.543	0.007	1.109	0.017	109.58	1.03	109.29	1.23
197	550	260	0.4727	1.8145	Decahedron	1.4843	-28584.0755	-4.4483	1.549	0.013	1.099	0.017	109.53	1.24	109.75	1.5
198	380	180	0.4737	1.6041	Decahedron	1.3644	-19772.6051	-4.4047	1.541	0.009	1.114	0.005	109.6	1.03	108.98	0.81
199	624	296	0.4744	2.0925	Small rhombicuboctahedron	1.0481	-32460.3928	-4.3952	1.546	0.016	1.105	0.011	109.56	1.42	109.38	0.98
200	488	232	0.4754	1.9436	Small rhombicuboctahedron	1.0481	-25397.2305	-4.3179	1.543	0.014	1.108	0.01	109.59	1.12	109.2	0.97
201	1101	532	0.4832	2.4868	Truncated cube	1.1772	-57296.6324	-1.8018	1.556	0.023	1.087	0.015	109.51	1.59	110.56	1.38
202	660	320	0.4848	2.1282	Cuboctahedron	1.105	-34392.5242	-4.6466	1.548	0.018	1.101	0.013	109.54	1.59	109.59	0.99
203	1000	486	0.486	2.4147	Cube	1.2407	-51936.6184	2.4752	1.555	0.033	1.102	0.042	109.56	2.08	109.9	2.35
204	450	220	0.4889	1.6971	Decahedron	1.7025	-23461.6085	-4.4995	1.548	0.011	1.102	0.016	109.54	1.27	109.43	1.68
205	286	144	0.5035	1.4591	Octahedron	1.1826	-14972.3429	-4.4072	1.538	0.005	1.118	0.004	109.6	0.47	109.09	0.26
206	142	72	0.507	1.1554	Cuboctahedron	1.105	-7405.213	-1.2191	1.554	0.063	1.113	0.002	108.38	6.8	112.22	1.71
207	350	180	0.5143	1.5607	Decahedron	2.092	-18336.8095	-4.5911	1.546	0.01	1.105	0.016	109.56	1.25	109.35	1.52
208	332	172	0.5181	1.5335	Rhombi-truncated cube	1.0346	-17413.1574	-1.4097	1.542	0.015	1.11	0.006	109.47	2.25	109.61	1.6
209	329	172	0.5228	1.5289	Rhombi-truncated octahedron	1.0833	-17279.6044	-4.3991	1.54	0.011	1.112	0.007	109.62	0.64	109.2	1.08
210	338	184	0.5444	1.5427	Rhombic dodecahedron	1.1053	-17822.01711	-4.4464	1.541	0.011	1.111	0.006	109.63	0.66	109.21	1.27
211	537	300	0.5587	2.0001	Cuboctahedron	1.105	-28351.1177	-4.3997	1.553	0.021	1.095	0.014	109.52	1.81	110.04	1.19
212	250	140	0.56	1.3951	Decahedron	2.5723	-13212.2772	-4.6534	1.543	0.008	1.109	0.015	109.58	1.18	109.26	1.02
213	210	120	0.5714	1.3164	Decahedron	1.6792	-11126.3729	-4.6493	1.541	0.012	1.114	0.005	109.62	1.118	109.01	0.64
214	512	294	0.5742	1.9717	Cube	1.2407	-27001.6447	-0.1222	1.554	0.034	1.107	0.04	109.56	2.82	109.53	2.27
215	310	180	0.5806	1.4989	Decahedron	1.025	-16433.9144	-3.5071	1.55	0.014	1.1	0.014	109.52	1.31	109.89	0.99
216	577	340	0.5893	2.0437	Cube	1.2407	-30621.8584	-1.7522	1.557	0.025	1.09	0.013	109.52	1.7	110.4	1.38
217	250	150	0.6	1.3951	Decahedron	1.2473	-13301.3518	-3.4712	1.549	0.013	1.102	0.014	109.54	1.32	109.79	1.02
218	165	100	0.6061	1.2147	Octahedron	1.1826	-8803.2085	-3.006	1.537	0.005	1.117	0.004	109.63	0.51	109.14	0.3
219	180	110	0.6111	1.2504	Decahedron	1.2183	-9607.8187	-3.1222	1.539	0.01	1.114	0.005	109.62	0.82	109.22	0.84
220	179	112	0.6257	1.2481	Rhombi-truncated cube	1.0346	-9556.3683	2.1557	1.54	0.018	1.11	0.006	109.63	1.07	109.21	1
221	190	120	0.6316	1.2732	Decahedron	1.604	-10168.7664	-2.6825	1.547	0.012	1.104	0.015	109.57	1.33	109.64	1.04
222	140	90	0.6429	1.15	Decahedron	1.0282	-7515.8906	-3.5722	1.539	0.01	1.114	0.004	109.63	0.86	109.21	0.08
223	184	120	0.6522	1.2596	Rhombic dodecahedron	1.1053	-9896.9587	-6.1221	1.54	0.012	1.112	0.005	109.65	0.67	109.34	1
224	175	116	0.6629	1.2388	Rhombi-truncated octahedron	1.0833	-9429.6678	-4.7816	1.542	0.02	1.112	0.007	109.34	3.11	109.89	1.57
225	130	90	0.6923	1.1219	Decahedron	1.2727	-7037.8276	-3.5411	1.543	0.016	1.111	0.008	109.63	1.59	109.18	0.8
226	216	150	0.6944	1.3288	Cube	1.2407	-11618.0497	1.0691	1.552	0.037	1.114	0.046	109.49	4.46	109.51	2.22
227	100	70	0.7	1.028	Decahedron	1.3721	-5423.9526	-3.2392	1.538	0.01	1.115	0.004	109.64	0.92	109.2	0.73
228	95	70	0.7368	1.0105	Decahedron	1.0565	-5185.6489	-3.077	1.54	0.014	1.113	0.005	109.65	1.33	109.11	0.71
229	160	120	0.75	1.2023	Decahedron	1.0339	-8750.9758	-3.4519	1.547	0.021	1.018	0.006	109.59	1.92	109.17	0.72
230	115	90	0.7826	1.077	Decahedron	1.3989	-6329.1153	-2.7892	1.542	0.015	1.111	0.004	109.63	1.55	109.09	0.78
231	85	70	0.8235	0.9737	Decahedron	1.0371	-4708.275	-2.9241	1.547	0.014	1.105	0.011	109.54	1.43	109.87	1.05
